# Supplementary material
Source: PubMed Central journal article supplement (PMC1464900)
Supplement: JCI0626991sd.pdf [file JCI0626991sd.pdf]

**Supplementary Table I. Characteristics of the experimental groups before and during the pancreatic clamp studies**

|                         | SCR ASO SC | SCR ASO OF | SCD1 ASO OF |
|-------------------------|------------|------------|-------------|
| <b>Basal</b>            |            |            |             |
| Body weight (g)         | 296±4      | 300±2      | 295±5       |
| Food Intake (Kcal/day)‡ | 69±3       | 134±6      | 138±4       |
| Glucose (mM)            | 8.1±0.2    | 7.8±0.3    | 8.1±0.2     |
| Insulin (ng/ml)         | 1.1±0.1    | 1.3±0.3    | 1.1±0.1     |
| Leptin (ng/ml)          | 1.5±0.2    | 1.6±0.2    | 1.5±0.3     |
| FFA (mM)                | 1.0±0.2    | 0.9±0.1    | 1.0±0.1     |
| <b>Clamp</b>            |            |            |             |
| Glucose (mM)            | 7.6±0.1    | 7.6±0.1    | 7.2±0.4     |
| Insulin (ng/ml)         | 2.6±0.1    | 3.1±0.2    | 2.6±0.2     |
| Leptin (ng/ml)          | 1.2±0.2    | 1.5±0.2    | 1.5±0.3     |
| FFA (mM)                | 0.8±0.1    | 0.8±0.1    | 0.6±0.1*    |
| Adiponectin (ng/ml)     | 1.7±0.0    | 1.8±0.4    | 1.4±0.2     |
| Glucagon (pg/ml)        | 35±1       | 35±3       | 30±5        |

Values during the clamp represent the steady-state levels obtained by averaging the results of at least four samples during the experimental period. FFA, free fatty acids. ‡ Average food intake over last 3-days before the clamp study. SC=standard chow; OF=over-feeding \*p<0.05 vs SCR ASO OF.

**Supplementary Table 2. Specific activities of hepatic substrates used to calculate the “direct pathway” and the “indirect pathway” at the end of the [3-<sup>3</sup>H]glucose-[U-<sup>14</sup>C]lactate infusions**

| Group              | [ <sup>14</sup> C]-PEP | [ <sup>14</sup> C]UDPGlc | <b>Indirect</b>  | [ <sup>3</sup> H]Glc | [ <sup>3</sup> H]UDPGlc | <b>Direct</b>   |
|--------------------|------------------------|--------------------------|------------------|----------------------|-------------------------|-----------------|
|                    | dpm/mmol               |                          | %                | dpm/mmol             |                         | %               |
| <b>SCR ASO SC</b>  | 23.2±1.9               | 11.0±1.3                 | <b>23.7±2.6</b>  | 36.6±3.1             | 12.5±1.3                | <b>34.7±3.3</b> |
| <b>SCR ASO OF</b>  | 7.2±2.6                | 2.4±0.7                  | <b>20.8±8.4</b>  | 26.4±1.9             | 7.5±1.3                 | <b>33.0±5.3</b> |
| <b>SCD1 ASO OF</b> | 27.8±13.6              | 6.2±1.3                  | <b>38.0±18.9</b> | 24.9±3.5             | 5.9±1.1                 | <b>23.9±2.1</b> |

Abbreviations: PEP, phosphoenolpyruvate; UDPGlc, uridinediphosphoglucose; Indirect, percent of the hepatic Glc-6-P pool derived from PEP-gluconeogenesis; Glc, glucose; Direct, percent of the hepatic Glc-6-P pool derived from plasma glucose.

**Supplementary Table 3. Diet Composition**

| <b>Calories provided</b>                                                                                    | <b>Standard Chow Diet (SC)</b> | <b>SC Diet with 10% Lard* (High Fat Diet)</b> |
|-------------------------------------------------------------------------------------------------------------|--------------------------------|-----------------------------------------------|
| Carbohydrate (%)                                                                                            | 60                             | 45                                            |
| Protein (%)                                                                                                 | 28                             | 22                                            |
| Fat (%)                                                                                                     | 12                             | 33                                            |
| Saturated                                                                                                   | 3.1                            | 9.4                                           |
| Monounsaturated                                                                                             | 4.7                            | 11.2                                          |
| Polyunsaturated                                                                                             | 5.0                            | 4.9                                           |
| Total Calorie Provided by Digestible Nutrients (Kcal/g)                                                     | 3.00                           | 5.14                                          |
| *Lard composition:2% myristic acid, 24% palmitic acid, 13% stearic acid, 46% oleic acid, 12% linoleic acid. |                                |                                               |
